# Supplementary material for: Metabolism of the Marine Phycotoxin PTX-2 and Its Effects on Hepatic Xenobiotic Metabolism: Activation of Nuclear Receptors and Modulation of the Phase I Cytochrome P450
Source: PubMed Central journal article supplement (PMC5535159; doi:10.3390/toxins9070212), 2017-07-05
Supplement: toxins-09-00212-s001.pdf [file toxins-09-00212-s001.pdf]

# Supplementary Materials: Metabolism of the Marine Phycotoxin PTX-2 and Its Effects on Hepatic Xenobiotic Metabolism: Activation of Nuclear Receptors and Modulation of the Phase I Cytochrome P450

Jimmy Alarcan, Estelle Dubreil, Antoine Huguet, Dominique Hurtaud-Pessel, Stefanie Hessel-Pras, Alfonso Lampen, Valérie Fessard, and Ludovic Le Hegarat

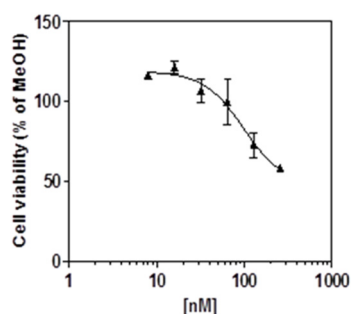

**Figure S1.** Cell viability in HepaRG cells. Following 24 h of treatment with different concentrations of PTX-2, the nuclei were stained with 1 µg/mL DAPI and scored using ArrayScan. The results were obtained from three independent experiments performed in triplicate (mean ± SD).

**Table S1.** Effects of PTX-2 on mRNA expression of CYP1A1, 1A2, 2B6, and SULT1E1 in HepaRG cells. The data represent the means of fold change compared to solvent control.

| Gene    | Assay   | (nM) |      |      |
|---------|---------|------|------|------|
|         |         | 16   | 32   | 64   |
| CYP1A1  | assay 1 | 2.7  | 4.7  | 5.5  |
|         | assay 2 | 2.8  | 4.9  | 6.7  |
|         | assay 3 | 7.2  | 20.6 | 43.8 |
| CYP1A2  | assay 1 | 4.7  | 5.0  | 8.2  |
|         | assay 2 | 3.7  | 9.1  | 13.9 |
|         | assay 3 | 4.8  | 10.7 | 4.3  |
| CYP2B6  | assay 1 | 1.1  | 1.9  | 1.9  |
|         | assay 2 | 2.2  | 5.6  | 6.4  |
|         | assay 3 | 1.4  | 2.0  | 2.1  |
| SULT1E1 | assay 1 | 1.3  | 1.7  | 7.4  |
|         | assay 2 | 0.8  | 0.8  | 1.1  |
|         | assay 3 | 3.1  | 4.6  | 2.2  |

**Table S2.** Summary of primers used for q-PCR analysis.

| Gene   | Sequence (5' to 3')         | Gene    | Sequence (5' to 3')          |
|--------|-----------------------------|---------|------------------------------|
| AHR    | F: TAGGGTTTCAGCAGTCTGATGTC  | SULT1E1 | F: ACAGGATCAACTAAACAGTGTACCA |
|        | R: CTA CTGTCTGGGGGAGACCA    |         | R: ATCTGGTCTTGCCTGGAACG      |
| NR1I2  | F: AGACACTGCAGGTGGCTTC      | UGT1A1  | F: CTGCCTTCACCAAAATCCA CTATC |
|        | R: TGGGGAGAAGAGGGAGATGG     |         | R: CACAGGACTGTCTGAGGGATT     |
| CYP1A1 | F: ACCCTGAAGGTGACAGTTCC     | UGT1A9  | F: CCGAGTATGATCTCTACAGCCAC   |
|        | R: TCTTGGAGGTGGCTGAGGTA     |         | R: TTCAAATTCATAGGCAACGGC     |
| CYP1A2 | F: CTTGCTACCTGCCTAACCC      | UGT2B4  | F: GAAGTCTAGGAAGACCCACTACG   |
|        | R: CCCGGACACTGTTCTTGTC A    |         | R: GGGTGAGGAAATGAAAATCC CAG  |
| CYP2B6 | F: TTCGGCGATTCTCTGTGACC     | ABCB1   | F: CAGCTGTTGTCTTTGGTGCC      |
|        | R: ATGAGGGCCCCCTTG GAT      |         | R: CCAATGTGTTCCGGCATTAGGC    |
| CYP2C9 | F: AAATGGAGAAGGAAAAGCACAACC | ABCC2   | F: GTGTGGATTCCCTTGGGCTT      |

|         |                              |         |                              |
|---------|------------------------------|---------|------------------------------|
|         | R: TCAACTGCAGTGTTTTCCAAGC    |         | R: GAAGAAAACCAACGAATACCTGCTT |
| CYP2C19 | F: CCTGGAACGCATGGTGGT        | ABCC3   | F: CCAACTCAGTCAAACGTGCG      |
|         | R: TCCATTGCTGAAAACGATTCCAAAT |         | R: ACCTAGGTTCTGCCAGAGGA      |
| CYP3A4  | F: TCACAAACCGGAGGCCTTTT      | ABCG2   | F: AGTTCTCAGCAGCTCTTCGG      |
|         | R: TGGTGAAGGTTGGAGACAGC      |         | R: TTCCAACCTTGGAGTCTGCC      |
| CYP3A5  | F: GCCCAATAAGGCACCACCTA      | SLC22A1 | F: TGTCAAATTTGTTGGCGGGG      |
|         | R: CCACCATTGACCCTTIGGGA      |         | R: TTTAACCAGTGCAGGTCAGGT     |
| GSTM1   | F: GGGGGACGCTCCTGATTATG      | SLC22A3 | F: GCATTGCTAAGTGCAATGGGA     |
|         | R: GGGCAGATTGGGAAAGTCCA      |         | R: GCTTGTGAACCAAGCAAACATAAG  |
| NAT1    | F: ACTAAGAAAGGGGATCATGGACATT | SLCO1A2 | F: GCACAAGAGTATTTGCTGGCAT    |
|         | R: ACAGCTCGGATCTGGTGTG       |         | R: CGGCAATCCGAGGTAGATGT      |
| NAT2    | F: ACAGACCTTGGAAAGCAAGAGG    | SLCO1B1 | F: TCCACATCATTTCAAGGGTCTACT  |
|         | R: CTTCAATGTCCATGATCCCTTTGG  |         | R: TGCTTCATCCATGACACTTCCAT   |
| SULT1A1 | F: TCGGAGAAGTGTCTACGGAT      | GAPDH   | F: GTCAAGGCTGAGAACGGGAA      |
|         | R: CCACGAAGTCCACGGTCTC       |         | R: AAATGAGCCCCAGCCTTCTC      |
